1 **A more physiological approach to lipid metabolism alterations in cancer: CRC-like**  
2 **organoids assessment**

3

4 Silvia Cruz-Gil<sup>1</sup>, Dr. Ruth Sanchez-Martinez<sup>1</sup>, Sonia Wagner-Reguero<sup>1</sup>, Dr. Daniel Stange<sup>2</sup>, Dr.

5 Sebastian Schölch<sup>3,4,5</sup>, Dr. Kristin Werner<sup>2</sup> and Dr. Ana Ramirez de Molina<sup>1,\*</sup>.

6 <sup>1</sup> Molecular Oncology Group/ IMDEA Food Institute, CEI UAM + CSIC, Ctra. De Cantoblanco,

7 8 E-28049 Madrid, Spain.

8 <sup>2</sup> Department of Gastrointestinal, Thoracic and Vascular Surgery, University Hospital Carl Gustav

9 Carus, Technische Universität Dresden, Fetscherstraße 74, 01307 Dresden, Germany.

10 <sup>3</sup> Medizinische Fakultät und Universitätsklinikum Mannheim, Ruprecht-Karls-Universität

11 Heidelberg, Theodor-Kutzer-Ufer 1-3, 68167 Mannheim

12 <sup>4</sup> German Cancer Consortium (DKTK)

13 <sup>5</sup> German Cancer Research Center (DKFZ), Heidelberg, Germany

14 \*Correspondence to Dr. Ana Ramirez de Molina. (E-mail: [ana.ramirez@imdea.org](mailto:ana.ramirez@imdea.org)).

15 **Running head**

16 Handling organoids for an optimal lipid metabolism-related CRC analysis.

## 18 **Abstract**

19

20 Precision medicine might be the response to the recent questioning of the use of metformin as an  
21 anticancer drug in colorectal cancer (CRC). Thus, in order to establish properly its benefits, its  
22 application need to be assayed on the different progression stages of CRC. In this way, organoids  
23 imply a more physiological tool, representing a new therapeutic opportunity for CRC  
24 personalized treatment to assay tumor stage-dependent drugs effects. Since the lipid metabolism-  
25 related axis, ACSL/SCD, stimulates colon cancer progression and Metformin is able to rescuing  
26 the invasive and migratory phenotype conferred to cancer cells upon this axis overexpression; we  
27 checked ACSL/SCD status, its regulatory miRNAs and the effect of Metformin treatment in  
28 organoids as a model for specific and personalized treatment. Despite ACSL4 expression is  
29 upregulated in CRC-like organoids, Metformin is able to downregulate it, especially in the first  
30 stages. Besides, organoids are clearly more sensitive in this first stage (Apc mutated) to  
31 Metformin than current chemotherapeutic drugs such as fluorouracil (5-FU). Metformin performs  
32 an independent “Warburg effect” blockade to cancer progression and is able to reduce crypt stem  
33 cell markers expression such as Lgr5+. These results suggest a putative increased efficiency of  
34 the use of Metformin in the first stages of CRC than in advanced disease.

35 **Keywords:** CRC-like organoids, colorectal cancer, ACSL/SCD axis, lipid metabolism, acyl-CoA  
36 synthetases, Stearoyl-CoA desaturase, Metformin, LGR5+, non-Warburg metabolism,  
37 personalized medicine.

38 **Abbreviations:** ACSL1: Acyl-CoA synthetase 1; ACSL4: Acyl-CoA synthetase 4; CRC:  
39 Colorectal cancer; EMT: Epithelial-mesenchymal transition; 5-FU: Fluorouracil; MiRNAs/ miR:  
40 MicroRNAs; MTT: 3-(4, 5-dimethylthiazol-2-yl)-2, 5-diphenyltetrazolium bromide; OAA:  
41 Oxaloacetate; SCD: Stearoyl-CoA desaturase; TCA: Tricarboxylic Acid cycle; 2D: 2-  
42 dimensional; 3D: 3-dimensional.

43

## 44 **Introduction**

45

46 Colorectal cancer (CRC) is the third most common cancer in men (10% of the total), after lung  
47 and prostate cancer, and the second in women (9.2% of the total), after breast cancer [1]. Most of  
48 the CRC cases are sporadic (70-80%), which consists of the acquisition of somatic mutations and  
49 in which there is no family history or genetic predisposition. The remaining cases (20-30%) are  
50 those among close relatives, which are divided into inherited or familial CRC, [2]. Genetically,  
51 sporadic CRC development is due to the abnormalities accumulation in tumor suppressor genes  
52 and oncogenes [3,3]. Previous research postulated the adenoma-carcinoma transition theory, in  
53 which specific somatic mutations promoting tumorigenesis are acquired; proposed by Fearon and  
54 Vogelstein (Vogelgram). The Vogelgram proposes that the adenoma-carcinoma sequence model  
55 would start with loss of the *APC* gene, followed by mutations in *KRAS* or *BRAF* genes, mutations  
56 or loss of *TP53* gene and of SMAD family member 4 (*SMAD4*) [4].

57 Over the last decade, the interest in metabolic research with respect to cancer has been  
58 expansively increased. The first and most characterized tumor metabolism event to be described  
59 is the exacerbated glucose uptake and glycolysis utilization; which even in normoxic condition,  
60 are not used for maximal ATP generation via mitochondrial respiration. This phenomenon is  
61 denoted as the “Warburg effect”.

62 Even though lipid-associated pathways are functionally dependent on glucose and glutamine  
63 catabolic pathways, are now a well-recognized and frequently described cancer metabolic feature  
64 with a key role in their tumorigenesis. This is the case for the ACSL/SCD axis [5], a lipid  
65 metabolism-related network described to promote tumorigenesis through an epithelial-  
66 mesenchymal transition (EMT) program that promotes migration and invasion of colon cancer  
67 cells. The mesenchymal phenotype produced upon overexpression of these enzymes is reverted  
68 through reactivation of AMPK signaling performed by the well-known anti-diabetic drug,  
69 Metformin. Though its mechanism of action is not fully understood, Metformin has shown a

70 robust anti-proliferative effect on several types of cancer such as colon, pancreatic, breast,  
71 ovarian, prostate and lung cancer cells [6]. Furthermore, Metformin has been recently associated  
72 with improved survival of cancer patients, including CRC, though its use as an antitumoral agent  
73 has not been established yet [7]

74 The ACSL/SCD axis pro-tumorigenic activity has been also described to be post-transcriptionally  
75 regulated by miRNAs. miR-544a, miR-142, and miR-19b-1 has been proposed as major  
76 regulators of the ACSL/SCD network and the miR-19b-1-3p isoform decreased expression  
77 associated with a poorer survival rate in CRC patients, consistently with ACSL/SCD involvement  
78 in patients relapse [8].

79 To get insight into the metabolic implication on CRC progression with a special focus on the  
80 ACSL/SCD axis and the effect of metformin in each case, more personalized and physiological  
81 tools are needed since most of the available data rely on traditional studies using cancer cell lines  
82 cultures. In this way, the organoid culture system opens a new methodological door for *ex vivo*  
83 studies.

84 Adult tissue-derived epithelial organoids, also called “mini guts” [9] are stereotypic tissue-like  
85 structures derived from digestive healthy tissues or tumors which mimics *in vitro* the tissue  
86 composition and morphology of their *in vivo* counterparts [10]. This methodology was first  
87 established in long-term primary culture from mouse small intestinal crypts to generate epithelial  
88 organoids with crypt- and villus-like epithelial domains representing both progenitor and  
89 differentiated cells [11].

90 The organoids technology takes advantage of the intestinal epithelium self-renewing capacity.  
91 Organoids starts from LGR5+ gut epithelial stem cells forming symmetric cyst structures, which  
92 finally will form budding structures resembling intestinal crypts. These budding structures are  
93 formed by these LGR5+ stem cells flanked by differentiated daughter cells [9].

94 Organoids are currently employed in colorectal cancer studies and chemotherapy assessment  
95 [12,13]. Along with intestinal organoids, similar epithelial organoids culture conditions for other  
96 mouse and human digestive epithelial tissues have been also adapted [14–17] including tumor-  
97 derived organoids from cancer patients. Importantly, organoids grow as pure epithelial cultures  
98 without any contamination of vessels, immune cells or non-transformed mesenchymal which  
99 leads to an accurate sequencing or expression profiling [10].

100

## 101 **Materials and Methods**

### 102 **CRC-like organoids: culture and maintenance**

103 **Mice:** Mutant intestinal murine organoids were obtained from the Universitätsklinikum Carl  
104 Gustav Carus, Dresden. All procedures involving animals were conducted strictly in accordance  
105 with FELASA regulations and approved by the animal welfare committees of the Technische  
106 Universität Dresden and the Landesdirektion Sachsen prior to initiation of the experiments.

107 Mice with conditional mutations in *Apc*, *Kras*, *Tp53* and *Smad4* were obtained from the NCI  
108 Mouse Repository (*Apc*, *Kras* *Tp53*) or the Jackson Laboratory (*Smad4*) and interbred to obtain  
109 compound mutant mice (Table 1). The CRC-like organoid model represents the adenoma-  
110 carcinoma sequence with the most common acquired mutations in a sporadic CRC: *APC*<sup>fl/fl</sup>,  
111 *KRAS*<sup>G12D/WT</sup>, *P53*<sup>R172H/WT</sup> and *Smad4*<sup>fl/fl</sup> (corresponding to stages I to IV) (Table 2). The parental  
112 mouse lines were described in Table 2.

113

114 **Table 1:** Parental mouse lines and publication's PMID of the mutations in the organoids

| Mutation                    | Designation | PMID     |
|-----------------------------|-------------|----------|
| <i>APC</i>                  | NCI: 01XAA  | 17002498 |
| <i>KRAS</i> <sup>G12D</sup> | JAX: 008179 | 11323676 |
| <i>P53</i> <sup>R172H</sup> | JAX: 008652 | 15607980 |
| <i>P53 floxed</i>           | NCI: 01XC2  | 11694875 |
| <i>Smad4 floxed</i>         | JAX: 017462 | 11857783 |

115

116 **Table 2:** CRC-like organoids with the acquired mutations related to the stage.

| Organoid mutation                                                                                                             | CRC-like stage |
|-------------------------------------------------------------------------------------------------------------------------------|----------------|
| WT                                                                                                                            | -              |
| <i>APC</i> <sup>fl/fl</sup>                                                                                                   | I              |
| <i>APC</i> <sup>fl/fl</sup> , <i>KRAS</i> <sup>G12D/WT</sup>                                                                  | II             |
| <i>APC</i> <sup>fl/fl</sup> , <i>KRAS</i> <sup>G12D/WT</sup> , <i>P53</i> <sup>fl/R172H</sup>                                 | III            |
| <i>APC</i> <sup>fl/fl</sup> , <i>KRAS</i> <sup>G12D/WT</sup> , <i>P53</i> <sup>fl/R172H</sup> , <i>Smad4</i> <sup>fl/fl</sup> | IV             |

117

118 Murine organoids mutagenesis is conditioned by the Cre/loxP system. Adenoviral infections  
119 were performed as explained in [18] to provide active mutations.

120

121 **Crypt isolation and organoid culture:** Crypts were isolated from the murine small  
122 intestine by incubation for 30 min at 4°C in PBS containing 2 mM EDTA as previously reported  
123 [11,19]. Isolated crypts were seeded in Matrigel (Corning® Matrigel® Matrix). The basic culture  
124 medium (Advanced Dulbecco's modified Eagle Medium DMEM/F12 complemented with  
125 penicillin/streptomycin, 10 mmol/L HEPES, 1x Glutamax [Gibco], named ADF +++) was  
126 supplemented with: 100 ng/ml Noggin (Peprotech), R-spondin (conditioned medium, 10% final  
127 volume), 1x B27 (Invitrogen), 1x N2 (Invitrogen), 1,25 mM N-acetylcysteine (Sigma-Aldrich),  
128 100 µg/mL Primocin TM (InvivoGen) and 50 ng/mL mEGF (Thermofisher). The complete media  
129 is named supplemented ADF +++ media. For passaging, organoids were removed from Matrigel  
130 and mechanically dissociated with a glass pipette, pelleted and then transferred to fresh Matrigel  
131 [11,14,20]. Splitting was performed twice a week in a 1:3 split ratio. Cultures were kept at 37 °C,  
132 5% CO2 in humidity.

### 133 **Drugs treatment - viability assays**

134 Cell viability was determined by counting and seeding 1000 crypts in 60% of Matrigel in 48-well  
135 plates. After 2 days of culture, organoids were exposed 48 hours to 10 µM Metformin (Sigma) or  
136 10, 100 or 150 µM 5-FU (Sigma) in supplemented ADF +++ media, as indicated in the figures.  
137 At this point, organoids were collected, split and reseeded for recovery experiments over 72 hours  
138 in supplemented ADF +++ media.

139 Upon treatments (48h) or recovery assays (post-72h), organoids were incubated 3 hours with 3-  
140 (4,5-dimethyl-thiazol-2-yl)-2,5-diphenyl-tetrazolium (MTT, Sigma). After discarding the media,  
141 20 µl of 2% SDS (Sigma) solution in H2O was added to solubilize Matrigel (2 h, 37 °C). The

142 resultant formazan was dissolved in 100  $\mu$ l of DMSO for 1 h (37 °C). The absorbance was  
143 measured on the microplate reader (Asys UVM 340, Isogen life science) at 562 nm.

144 Untreated organoids were defined as 100% viable. Data were expressed as the fold change of  
145 viable cells from treated organoids compared to the non-treated organoids.

## 146 **RNA isolation and RT-QPCR**

147 For RNA isolation, organoids were released from Matrigel (Corning) with cold Dispase (Corning)  
148 and pelleted by centrifugation. The supernatant was removed and pelleted organoids were  
149 carefully resuspended in Trizol (Qiagen), and storage at -80°C. RNA was isolated according to  
150 the supplier's protocol (Invitrogen) and the concentration and purity (A260/A280 ratio) were  
151 determined by spectrophotometric analysis (NanoDrop 2000 Spectrophotometer  
152 ThermoScientific). 20 ng/ $\mu$ l RNA was reverse-transcribed using the High Capacity RNA-to-  
153 cDNA kit (ThermoFisher), according to manufacturer's instructions. Relative gene expression  
154 was measured using VeriQuest Fast SYBR Green qPCR Master Mix (2X) (Isogen). Primers used  
155 are listed in S1 Table. Regarding miRNAs, their expression was monitored using TaqMan®  
156 MicroRNA Reverse Transcription Kit (ThermoFisher Scientific) and Taq-man miRNA probes for  
157 RT-qPCR (S2 Table). RT-QPCRs were performed on the QuantStudio 12K Flex (Applied  
158 Biosystems) and the  $2^{-\Delta\Delta C_t}$  method was applied to calculate the relative gene or miRNA  
159 expression.

## 160 **L-Lactate quantification**

161 Organoids were seeded at a density of 1000 crypts per well in a 48-well plate. After 48 hours, the  
162 medium was changed to PBS, 10 mM of Metformin or 10  $\mu$ M 5-FU in supplemented ADF +++  
163 media overnight at 37°C before quantification. Using Cayman's Glycolysis cell-based assay  
164 (Cayman, Ann Arbor, MI, USA, 600450) extracellular L-Lactate was measured by determining  
165 absorbance at 490 nm. L-Lactate measurements (mM) were normalized to total protein  
166 concentration (mg) x100.



167

168

169

## 170 **Statistical analysis**

171 All statistical analyses were performed using the Graph Pad Prism software (Ver. 7.03) (GraphPad

172 Software, San Diego, CA, USA). Significance between groups was determined by *t*-test analyses

173 (unpaired Student's *t*-tests). Data with  $P < 0.05$  were considered statistically significant (ns,  $P >$

174  $0.05$ ; \*,  $P \leq 0.05$ ; \*\*,  $P \leq 0.01$ ; \*\*\*,  $P \leq 0.001$ ; \*\*\*\*,  $P \leq 0.0001$ ). All reported *p* values were

175 two-sided. All values are reported as mean  $\pm$  S.D.

176

177

## 178 **Results**

### 179 **ACSL4 is overexpressed throughout CRC-like organoids** 180 **stages**

181 ACSL4 has been previously reported to be overexpressed in malignant tumors, and together with  
182 ACSL1 and SCD form an axis involved in CRC progression. ACSL1, ACSL4, and SCD mRNA  
183 expression was measured in CRC-like organoids. ACSL4 mRNA was very significantly  
184 augmented in more aggressive stages compared to WT (Fig 1A). It is shown an intermediate  
185 expression pattern in Apc-mutated organoids, with a significantly differential expression (*p*-  
186 *value*: \*\*) compared to the following second stage (Apc, Kras mutated stage) henceforth.  
187 Conversely, ACSL1 and SCD levels were maintained or increased from the third stage henceforth,  
188 respectively (S1 Fig).

### 189 **Figure 1: ACSL4 is overexpressed throughout CRC-like organoids stages while miR-19b-1-** 190 **3p preserves its protective role.**

191 A) RT-QPCR analysis showing ACSL4 mRNA expression levels throughout CRC-like organoids  
192 stages. B) RT-QPCR analysis showing miR-19b-1-3p mRNA expression levels throughout CRC-  
193 like organoids stages. Results represent the fold-change mean  $\pm$ SD (*n* = 4) in plots A, (*n* = 3) in  
194 plots B. (ns, *P* > 0.05; \*, *P*  $\leq$  0.05; \*\*, *P*  $\leq$  0.01; \*\*\*, *P*  $\leq$  0.001; \*\*\*\*, *P*  $\leq$  0.0001)

195 Interestingly, organoids in more advanced stages (III and IV) presented a genetic misbalance in  
196 ACSL4 expression (Fig 1A) with huge differences in their fold inductions ranges in the same  
197 stage, though with a similar tendency.

### 198 **MiR-19b-1-3p keeps its protective role in CRC-like organoids**

199 MiRNAs expression was assayed in 3 different RNA extractions over time. Previous results from  
200 our group pointed toward a correlation between miR-19b-1-3p lower expression and a poorer

201 prognosis in CRC patients (which might have a putative high clinical interest due to its potential  
202 to be assed in plasma as a non-invasive biomarker); very likely through its involvement in cell  
203 invasion and lipid metabolism regulation [8]. In the case of CRC-like organoids, this tendency  
204 was maintained and miR-19b-1-3p expression was decreased in a stage-dependent manner (Fig  
205 1B).

206 Together with miR-19b-1-3p, miR-142 (3p and 5p isoforms) and miR-544a (without murine  
207 isoform) were also involved on targeting ACSL/SCD axis [8]. Hence, the previous mentioned  
208 miRs plus miR-19b-1-5p isoform was measured though no statistically significant differences  
209 were found in its expression (S2 Fig)

## 210 **Metformin decreases CRC-like organoids viability to the same** 211 **extent as current chemotherapy without significant effects on** 212 **WT organoids**

213 Since Metformin treatment, an AMPK activator used as antidiabetic treatment that has been  
214 recently associated to increased survival of cancer patients, was able to rescue the epithelial  
215 phenotype from the EMT process caused by the overexpression of ACSL/SCD in CRC cells [5];  
216 we wondered what this drug effect would be through the different stages in tumor progression.  
217 CRC-like organoids were treated with PBS, 10  $\mu$ M of Metformin or with the commonly used  
218 chemotherapeutic agent 5-FU; and the organoids viability was examined by MTT assays 48 hours  
219 upon treatment. None of the drugs affected significantly the viability of WT organoids (Fig 2A),  
220 while they were able to cause a decrease of about 50% in the viability of mutated organoids  
221 corresponding to the most aggressive phenotypes (Fig 2B-E). 5-FU higher concentrations (100  
222  $\mu$ M and 150  $\mu$ M) showed the same effects than the lower concentration (10  $\mu$ M) in mutated  
223 organoids, while they had stronger effects on WT ones (S3A-E Figs).

224 **Figure 2: Metformin decreases CRC-like organoids viability to the same extent as current**  
225 **chemotherapy without significant effects on WT organoids**

226 MTT cell viability assays upon 48 hours treatments with Metformin or 5-FU in the different CRC-  
227 like organoids representative stages (A) WT organoids; (B) *APC*<sup>fl/fl</sup> organoids resembling stage  
228 I; (C) *APC*<sup>fl/fl</sup>, *KRAS*<sup>G12D/WT</sup> organoids resembling stage II; (D) *APC*<sup>fl/fl</sup>, *KRAS*<sup>G12D/WT</sup>, *P53*<sup>R172H/WT</sup>  
229 organoids resembling stage III; (E) *APC*<sup>fl/fl</sup>, *KRAS*<sup>G12D/WT</sup>, *P53*<sup>R172H/WT</sup>, *Smad4*<sup>fl/fl</sup> organoids  
230 resembling stage IV. Data are represented by the fold-change mean  $\pm$ SD ( $n = 3$ ) in all the plots  
231 except A: ( $n=2$ ). (ns,  $P > 0.05$ ; \*,  $P \leq 0.05$ ; \*\*,  $P \leq 0.01$ ; \*\*\*,  $P \leq 0.001$ ; \*\*\*\*,  $P \leq 0.0001$ ).

232

233 **Metformin treatment recovery is significantly lower compared**  
234 **to 5FU in first stages organoids while WT organoids present an**  
235 **opposite behavior**

236 To further check the treatments scope, and analyzing not only the effect but also the potential  
237 reversibility of the treatment in normal and tumoral cells in different stages, organoids viability  
238 was assayed upon 48 hours treatment (PBS, Metformin or 5-FU) plus the subsequent recovery of  
239 72 additional hours in their growing media. In this case, WT organoids showed differential  
240 recovery sensitivity to the treatment. Metformin treated and recovered WT organoids presented  
241 almost similar measurements than only treated organoids. Nonetheless, 5FU treated WT  
242 organoids recoveries are noteworthy more sensitive and upon 72h recovery time their viability  
243 was quite significant reduced ( $p$ -value: \*\*\*) (Fig 3A). In *Apc* mutated organoids the recovery is  
244 very significantly lower upon Metformin treatment ( $p$ -value: \*\*\*\*) than 5-FU ( $p$ -value: \*),  
245 compared to PBS recovery control; making these *Apc* mutated organoids the most responsive to  
246 the Metformin treatment compared to 5-FU (Fig 3B). Regarding organoids corresponding to  
247 stages II-III (Figs 3C and D), both treatments presented almost similar recovery effects, while in  
248 stage IV organoids, 5-FU presented a stronger effect shown by the lower recovery of these 5-FU  
249 treated organoids (Fig 3E). Again 5-FU higher concentrations (100  $\mu$ M and 150  $\mu$ M) had nearly  
250 the same recovery effects than the lower concentration (10  $\mu$ M) (S4A-E Figs).

251 **Figure 3: Metformin treatment recovery is significantly lower compared to 5FU in first**  
252 **stages organoids while WT organoids present an opposite behavior**

253 MTT cell viability assays upon 48 hours treatments (black bars) and upon extra 72h post-  
254 treatment recovery with PBS (light grey bars) Metformin (yellow bars) or 5-FU (dark grey bars)  
255 in the different CRC-like organoids representative stages (A) WT organoids; (B)  $APC^{fl/fl}$   
256 organoids resembling stage I; (C)  $APC^{fl/fl}$ ,  $KRAS^{G12D/WT}$  organoids resembling stage II; (D)  $APC^{fl/fl}$   
257,  $KRAS^{G12D/WT}$ ,  $P53^{R172H/WT}$  organoids resembling stage III; (E)  $APC^{fl/fl}$ ,  $KRAS^{G12D/WT}$ ,  $P53^{R172H/WT}$   
258,  $Smad4^{fl/fl}$  organoids resembling stage IV. Data are represented by the fold-change mean  $\pm$ SD ( $n$   
259 = 3) in all the plots. (ns,  $P > 0.05$ ; \*,  $P \leq 0.05$ ; \*\*,  $P \leq 0.01$ ; \*\*\*,  $P \leq 0.001$ ; \*\*\*\*,  $P \leq 0.0001$ ).  
260 (F) Organoids pictures with PBS, Metformin or 5-FU, upon 48 hours treatments and upon extra  
261 72h post-treatment recovery as indicated. Pictures were captured using the  $\times 10$  objective, in  
262 bright field. Leica microscope (Leica microsystems).

263

264 Since WT organoids require more time to achieve their size and their crypt-like phenotype (Fig  
265 3F), the recovery measures are lesser than the mutated organoids. On the other hand, WT  
266 organoids recovered upon Metformin treatment presented a higher size than the ones treated with  
267 5-FU (Fig 3F). On the contrary, stage I (Apc mutated) organoids recovered upon Met treatment  
268 showed an evident reduced size compared with the control and the 5-FU treated ones. In  
269 accordance with viability assays results, this effect is lost in further stages; where Metformin is  
270 less effective and Metformin treated recovered organoids presented a bigger size than the ones  
271 treated with 5-FU.

272 By way of clarification, all mutated organoids presented Apc mutated since is the first gene in the  
273 adenocarcinoma sequence. Apc completed deletion provokes a hyperactive Wnt signaling. This  
274 aberration makes an organoids phenotype switch, losing their crypt-like structure and adopting a  
275 cystic morphology [17,21]

## 276 **Metformin action is stronger on ACSL4 and SCD** 277 **overexpressing first stages organoids**

278 Since stage I organoids seemed to present a differential sensitivity to metformin compared to  
279 other stages, together with a differential expression of ACSL4, we aimed to analyze the possible  
280 link between Metformin and ACSL/SCD axis in intestinal organoids.

281 To this aim, ACSL4 expression was measured, as well as the other enzymes of the ACSL/SCD  
282 metabolic network (ACSL1 and SCD) upon 10  $\mu$ M Metformin treatment. ACSL4 mRNA  
283 expression was strongly reduced by this drug compared to their non-treated controls in stage I and  
284 II organoids. By contrast, stage III and IV presented no significance in their reduction or a slight  
285 significance, respectively. WT organoids also presented a slight reduction of ACSL4 mRNA upon  
286 Metformin treatment (Fig 4B). In addition, SCD expression levels were clearly decreased by  
287 Metformin in WT and stage I organoids, while a less marked tendency was found for stage III  
288 and IV organoids (Fig 4C). ACSL1 mRNA analysis showed less significant results (Fig 4A) upon  
289 Metformin treatment.

### 290 **Figure 4: Metformin action is stronger on ACSL4 and SCD overexpressing first stages** 291 **organoids and downregulates stem cell biomarker LGR5 and Wnt target genes expression** 292 **in all organoid stages.**

293 mRNA expression levels of enzymes related to the ACSL/SCD axis, ACSL4 (A), SCD (B), by  
294 RT-QPCR; and expression levels of different stem cell markers, Lgr5 (C), Axin-2 (D) and Ctnnb-  
295 1 (E) by RT-QPCR upon PBS (black bars) and 10  $\mu$ M Metformin (yellow bars). Data are  
296 represented by the fold-change mean to each PBS control  $\pm$ SD ( $n = 3$ ). (ns,  $P > 0.05$ ; \*,  $P \leq 0.05$ ;  
297 \*\*,  $P \leq 0.01$ ; \*\*\*,  $P \leq 0.001$ ; \*\*\*\*,  $P \leq 0.0001$ ).

298

299 The expression of these enzymes was also measured upon 10  $\mu$ M 5-FU treatment. This drug was  
300 able to significantly downregulate ACSL4 and SCD mRNA in most of the stages, though no

301 differences were showed between the effects in initial and later stages such as the case for  
302 Metformin treatment (S5A-C Figs).

### 303 **Metformin, but not 5-FU, downregulates stem cell biomarker** 304 **LGR5 and Wnt target genes expression in all organoid stages**

305 To further assay whether Metformin treatment was targeting the organoids crypts stem cell  
306 marker, LGR5; we analyzed its expression together with two other Wnt target genes, Axin2 and  
307 Ctnnb-1. Importantly, LGR5 expression was significantly diminished in the whole CRC-like  
308 organoids series upon Metformin treatment (Fig 4C) as well as Axin-2 (Fig 4D) and Ctnnb-1 (Fig  
309 4E) mRNAs. Surprisingly, this pattern was not maintained when organoids were treated with 10  
310  $\mu$ M 5-FU (S5D-F Figs).

### 311 **Metformin action in CRC-like organoids is not related to a** 312 **Warburg-effect impairment**

313 The avidity to perform glycolysis even in the presence of oxygen, known as the Warburg effect,  
314 is one of the hallmarks of tumors. For this reason, we measured the levels of L-lactate, the end  
315 product of glycolysis. CRC-like organoids presented increased glycolysis compared to WT  
316 organoids, reflecting an increasing Warburg effect throughout the stages, as expected. Even  
317 though 5-FU treatment caused a slight decrease in the glycolytic performance of the mutant  
318 organoids (Fig 5), Metformin treatment caused an opposite effect, increasing the glycolytic  
319 capacity in all stages, especially in stage I, the most sensitive to the drug. Thus, it seems that  
320 Metformin effect on CRC-like organoids viability relies in mechanisms other than preventing pro-  
321 tumorigenic Warburg effect, likely through the regulation of lipid metabolism.

### 322 **Figure 5: Metformin action in CRC organoids is not related to a Warburg-effect** 323 **impairment**

324 Bars represent the extracellular L-lactate production upon overnight PBS treatment (black bars),  
325 Metformin treatment (yellow bars) and 5-FU treatment (grey bars) using the Cayman's Glycolysis  
326 cell-based assay. L-lactate production measurement is normalized by total protein content (x100).

327 Data are represented by the fold-change mean  $\pm$ SD ( $n = 3$ ) in all the plots. (ns,  $P > 0.05$ ; \*,  $P \leq$   
328 0.05; \*\*,  $P \leq 0.01$ ; \*\*\*,  $P \leq 0.001$ ; \*\*\*\*,  $P \leq 0.0001$ ).

329

## 330 Discussion

331 Organoids seem to represent a good tool to study lipid metabolism [22] and previous studies  
332 employing intestinal organoids have linked the critical role of fatty acid metabolism to the  
333 intestinal epithelial integrity *in vivo* [23]. Therefore, we propose this system to get insight into  
334 cancer progression mechanisms in regards to fatty acid metabolism and therefore, to assay  
335 ACSL/SCD protumorigenic axis action in CRC.

336 We showed that ACSL4 augmented while miR-19b-1-3p diminished its expression, both  
337 progressively, in murine CRC-like organoids. Metformin action compared to the  
338 chemotherapeutic agent 5-FU, in terms of viability reduction, was similar; although no significant  
339 reduction was found in WT organoids viability with any treatment. Stage I organoids were the  
340 most susceptible to Metformin action compared to 5-FU; while further stages presented similar  
341 or stronger sensitivity to 5-FU, including WT organoids. Besides, Metformin was able to reduce  
342 the intestinal crypt stem cell marker LGR5 in all the stages, together with two other Wnt  
343 downstream targets, Ctnnb-1 and Axin-2. Finally, we showed that even though the CRC-  
344 organoids series present a growing Warburg effect through the stages consistent with increased  
345 L-lactate levels; Metformin action on CRC organoids viability was not related to an ablation of  
346 Warburg effect.

347 The individual role of ACSL isoform 1 [24,25] and 4 [24,26] as well as SCD [27–31] in CRC has  
348 been extensively reported. Surprisingly, while ACSL4 mRNA levels are clearly increased through  
349 the stages in this organoids model, this was not the case for ACSL1, and SCD was only  
350 overexpressed in advanced stages. These results differ from previous ones using human CRC cells



351 which can be due to differential expression in murine tissues compared to human 2D cultures [5]  
352 [8]. Nevertheless, the use of murine organoids allows their genetic engineering and to accurately  
353 control the mutations for a better mechanistic characterization, rather than patient tumor-derived  
354 biopsies with the high variability that each tumor represent. Thus, our CRC model mimics a  
355 sporadic colorectal tumor with the common mutations acquired during the progression of this  
356 cancer. Due to the organoids results, the overexpression of the three enzymes could be only  
357 present in some punctual tumors. However, the overexpression of ACSL4 is preserved in murine  
358 organoids with the acquired CRC most common mutations (Fig 1A), indicating a predominant  
359 role of this ACSL/SCD component in these cancer progression aspects. The ACSL4 mRNA huge  
360 range of expression considering the most mutated stages (Fig 1A) could be explained since stages  
361 III and IV in real tumors present an uncontrolled genetic variability with the accumulation of  
362 other undetermined mutations. Organoids would be mimicking these uncontrolled stages,  
363 compared to the homogeneity presented in 2D cultures. Conversely, ACSL1 static role (S1A Fig)  
364 could be due to a lesser implication in tumor development in this system which can be also  
365 explained by the fact that the rodent protein is one residue longer (699 amino acids) than the  
366 human protein (698 amino acids), making it necessary to study the extent of this dissimilarity.  
367 For its part, SCD overexpression has been mainly reported in mesenchymal tissues, rather than  
368 epithelial ones, which are the only scaffold for organoids [32,33] giving a reason for the  
369 distinctive results found in these epithelial systems among the first stages (S1B Fig).

370 Regarding miRs expression, miR-19b-1-3p kept its tumor-suppressor role in murine CRC-like  
371 organoids, also reported as a good prognosis miRNA, able to target the axis [8]. The immature  
372 isoform of miR-19b-1-3p, miR-19b, and other members of the miR-17-92 cluster, where this  
373 miRNA is involved, regulate the self-renewal ability of gastric cancer stem cells [34]. The miR-  
374 17-92 cluster role is controversial and dependent on the cancer type [35,36]. However, it is  
375 interesting the reported role of this miRNA in digestive cancer stem cells, and its role in CRC  
376 stem cells may be a potential line of research henceforth. In line with our results, miR-19b was  
377 also reported to downregulate suppressor of cytokine signaling 3 (SOCS3), modulating chemokine

378 production in intestinal epithelial cells and thereby avoiding intestinal inflammation in Crohn's  
379 disease, which may ultimately prevent the derived disease, CRC [37].

380 Since Metformin was able to revert the ACSL/SCD EMT phenotype, we tried to gain insight on  
381 this process using organoid cultures resembling the different stages of a CRC progression.  
382 Metformin treatment seems to be more efficient than 5-FU only during first tumor stages, making  
383 organoids recovery harder compared to the ones treated with 5-FU. We propose that Metformin  
384 therapies could be an appealing alternative in those cases when the tumor is detected in very early  
385 stages rather than 5-FU treatments. However, some studies of Metformin treatment in CRC  
386 patients points to stage III to be the most likeable to present an effect [38]. Since CRC is very  
387 improbable to detect on its very early stages, known as one of the most silent and deadly cancer;  
388 we wonder whether these studies with a low number of candidates in stage I are enough  
389 representative.

390 As well, Metformin therapies has been proposed alone or in combination with other drugs, in  
391 CRC. For example, Metformin has been recently combined with aspirin to treat middle stages in  
392 non-diabetic CRC patients.( II and III stages) [39]. Furthermore, it exists a Phase 2 Trial for the  
393 study of Metformin and 5-Fluorouracil combination in metastatic CRC [40] ,concluded with a  
394 longstanding cancer control. An older report also claimed the benefits of this combination, but  
395 they also reported that Metformin alone has antineoplastic activity *per se* in colon cancer cells,  
396 and enhanced the activity of 5-FU, oxaliplatin and irinotecan in cells previously treated [41].

397 Previous reports hypothesized that the inhibition of mitochondrial complex I was the main  
398 mechanism of action for Metformin. However, recent studies suggest that cancer progression is  
399 compromised upon Metformin treatment, by decreasing the TCA cycle's anaplerosis. Metformin  
400 decreases the flow of glucose- and glutamine-derived metabolic intermediates into the TCA cycle,  
401 decreasing the citrate output of the mitochondria and leading to a reduction of acetyl-CoA (Ac-  
402 CoA) and oxaloacetate (OAA) in the cytoplasm and therefore a reduction in de novo FA synthesis  
403 [42]. This way, Metformin could be targeting lipid metabolism through ACSL/SCD axis. ACSL4

404 downregulation in the presence of Metformin is clearly evident and the results are larger  
405 significant in first stages (I, II) (Fig 4A). Maybe, the reduced overexpression of ACSL4 in the  
406 first stages (Fig 1A) increases the sensitivity to Metformin action (Fig 4A); while in more  
407 advanced stages, the overexpression is so high that Metformin action could appear to be less  
408 effective. This would not be the case for SCD, which showed no overexpression in the first stages  
409 and enhanced overexpression in III and IV stages, though it is significantly reduced upon  
410 Metformin exposure again in the first stages (Fig 4B). On the other hand, it has been reported that  
411 variations in the types and amounts of fatty acids, are able to modify intracellular ACSLs  
412 expression [43], thus, this conditions could be also affecting ACSL/SCD components expression  
413 besides that the network connection between those enzymes could make them present coordinated  
414 effects upon Metformin treatment, reducing its expression due to the lack of their substrate.  
415 Metformin was also previously reported to downregulate ACSL expression, lowering fatty acid  
416 synthesis and normalizing lipid profile in diabetic rats [44]; as well as limiting its products, 18-  
417 carbon chain length fatty acids, in skeletal muscle insulin resistant rats [45], suggesting in this  
418 case that metformin is increasing FAs mitochondrial channeling due to the reduction of CPT1  
419 inhibition by malonyl-CoA and therefore decreasing 18-carbon acyl-chain-derived bioactive  
420 lipids in the cytoplasm [45], This action of Metformin could be additional to the aforementioned,  
421 detoxifying ACSLs probable over activity.

422 Metformin seems also to target cancer stem cells of different cancer types [46]. However, we  
423 have described for the first time the LGR5 downregulation in CRC-like organoids upon  
424 Metformin treatment; consistent with previous reports using 2D CRC cultures [47]. LGR5 was  
425 diminished in the whole CRC-like organoids series to minimum levels, an indicative that  
426 Metformin action is affecting the stem cells of the crypt, responsible for the progression of the  
427 organoids lineage. Curiously, Metformin treated organoids do not present apoptosis or even  
428 necrosis, but they kept at a minimum size compared to other treatments, where the organoids layer  
429 disappeared and the cells appeared apoptotic in the lumen (S6 Fig), showing that cell membrane  
430 biogenesis is somehow blocked, mostly built by *de novo* lipogenesis routes.

431

432 Finally, Metformin treated CRC organoids exhibit a greater compensatory increase in aerobic  
433 glycolysis. Since ATP levels are diminished due to complex I inhibition, the metabolic sensor  
434 AMPK is activated, inhibiting mTOR and proliferative events; and promoting glycolysis as an  
435 alternative ATP source [48]. We found that even though the CRC-organoids serie presented an  
436 increasing glycolysis with the stages, (Fig 5); Metformin was able to increase more this glycolytic  
437 phenotype, especially in stage I organoids, coincident with the higher sensitivity to the drug in  
438 this organoids. These results point towards Metformin targeting different metabolic routes other  
439 that Warburg effect to perform its effect on CRC organoids viability.

440 Even though the Warburg effect is a priority for current drugs, each day the evidence grows that  
441 other metabolic pathways should be targeted for cancer progression ablation. CRC is a leading  
442 cause of death in the developed world, though yet simplistic preclinical models that mimic the  
443 usual stages of CRC progression are lacking [13]. In this way, organoids further analysis need to  
444 be included as the tool of choice for stage-dependent drugs screening.

445

## 446 **Conclusions**

### 447 **General conclusion**

- 448 1. Organoids display a precise platform to assay **tumor stage-dependent drugs** being  
449 suitable for **personalized medicine**, constituting an invaluable tool due to their relatively  
450 low costs, animal saving suffering and their ease and legibility to genetically manipulate.

### 451 **Metformin-related conclusions**

- 452 2. **Metformin** treatment is further proved as an efficient drug in CRC:

453

- 454 -It is able to decrease CRC-like organoids viability at the same rate as current  
455 chemotherapy (5-FU) but it does not affect to WT organoids.

456

457 -Metformin treatment recovery is significantly inferior compared to 5-FU in **first stages**  
458 **organoids**, but with a greater recovery in WT organoids; becoming an appealing  
459 chemotherapy drug in first tumor phases.

460

461 -Metformin downregulates the stem cell biomarker LGR5 and Wnt target genes  
462 expression in all CRC-like organoid stages, reaffirming its potential use in intestinal  
463 cancers.

464

465 -Metformin action in CRC organoids is not related to a Warburg-effect impairment,  
466 presuming that other metabolisms rather than Warburg should be targeted to complete  
467 the cancer progression obstruction

468

### 469 **ACSL/SCD-related conclusions**

470 3. **ACSL4** is progressively overexpressed throughout CRC-like organoids stages; while  
471 **miR-19b-1-3p** preserves its protective role, reflecting the role of ACSL/SCD axis action  
472 on CRC progression. Besides, Metformin action is stronger on ACSL4 and SCD-  
473 overexpressing first stages organoids, agreeing with Metformin greater action on this  
474 stage.

475

## 476 **Acknowledgment**

477 We kindly thank Dr. Daniel Stange and Dr. Schölch for providing the CRC-like organoids and to  
478 the whole Department of Gastrointestinal, Thoracic and Vascular Surgery at University Hospital  
479 Carl Gustav Carus for its continuous support .The research stay on this lab was kindly financed  
480 with the assistance of a Boehringer Ingelheim Fonds travel grant.

## 481 **Conflict of interest statement**

482 Authors declare no potential conflict of interest.

483

## 484 **Source of funding**

485 This work was supported by Ministerio de Economía y Competitividad del Gobierno de España  
486 (MINECO, Plan Nacional I+D+i AGL2016-76736-C3), Gobierno regional de la Comunidad de  
487 Madrid (P2013/ABI-2728, ALIBIRD-CM) and EU Structural Funds.

488

## 489   **References**

- 490   1.   Ferlay J, Soerjomataram I, Dikshit R, Eser S, Mathers C, Rebelo M, et al. Cancer  
491       incidence and mortality worldwide: sources, methods and major patterns in  
492       GLOBOCAN 2012. *Int J Cancer*. 2015;136: E359-386. doi:10.1002/ijc.29210
- 493   2.   Müller MF, Ibrahim AEK, Arends MJ. Molecular pathological classification of  
494       colorectal cancer. *Virchows Arch*. 2016;469: 125–134. doi:10.1007/s00428-016-  
495       1956-3
- 496   3. Yamagishi, H., Kuroda, H., Imai, Y., & Hiraishi, H. (2016). Molecular pathogenesis  
497       of sporadic colorectal cancers. *Chinese Journal of Cancer*, 35, 4.  
498       <http://doi.org/10.1186/s40880-015-0066-y>
- 499   4.   Fearon ER, Vogelstein B. A genetic model for colorectal tumorigenesis. *Cell*.  
500       1990;61: 759–767.
- 501   5.   Sánchez-Martínez R, Cruz-Gil S, Gómez de Cedrón M, Álvarez-Fernández M,  
502       Vargas T, Molina S, et al. A link between lipid metabolism and epithelial-  
503       mesenchymal transition provides a target for colon cancer therapy. *Oncotarget*.  
504       2015;6: 38719–38736. doi:10.18632/oncotarget.5340
- 505   6.   Nasri H, Rafieian-Kopaei M. Metformin: Current knowledge. *J Res Med Sci Off J*  
506       *Isfahan Univ Med Sci*. 2014;19: 658–664.
- 507   7.   Baglia ML, Cui Y, Zheng T, Yang G, Li H, You M, et al. Diabetes Medication  
508       Use in Association with Survival among Patients of Breast, Colorectal, Lung, or  
509       Gastric Cancer. *Cancer Res Treat Off J Korean Cancer Assoc*. 2018;  
510       doi:10.4143/crt.2017.591
- 511   8.   Cruz-Gil S, Sanchez-Martinez R, Gomez de Cedron M, Martin-Hernandez R,  
512       Vargas T, Molina S, et al. Targeting the lipid metabolic axis ACSL/SCD in  
513       colorectal cancer progression by therapeutic miRNAs: miR-19b-1 role. *J Lipid*  
514       *Res*. 2018;59: 14–24. doi:10.1194/jlr.M076752
- 515   9.   Sato T, Clevers H. SnapShot: Growing Organoids from Stem Cells. *Cell*.  
516       2015;161: 1700–1700.e1. doi:10.1016/j.cell.2015.06.028
- 517   10. Werner K, Weitz J, Stange DE. Organoids as Model Systems for Gastrointestinal  
518       Diseases: Tissue Engineering Meets Genetic Engineering. *Curr Pathobiol Rep*.  
519       2016;4: 1–9. doi:10.1007/s40139-016-0100-z
- 520   11. Sato T, Vries RG, Snippert HJ, van de Wetering M, Barker N, Stange DE, et al.  
521       Single Lgr5 stem cells build crypt-villus structures in vitro without a mesenchymal  
522       niche. *Nature*. 2009;459: 262–265. doi:10.1038/nature07935
- 523   12. Golovko D, Kedrin D, Yilmaz ÖH, Roper J. Colorectal cancer models for novel  
524       drug discovery. *Expert Opin Drug Discov*. 2015;10: 1217–1229.  
525       doi:10.1517/17460441.2015.1079618

- 526 13. O'Rourke KP, Loizou E, Livshits G, Schatoff EM, Baslan T, Machado E, et al.  
527 Transplantation of engineered organoids enables rapid generation of metastatic  
528 mouse models of colorectal cancer. *Nat Biotechnol.* 2017;35: 577–582.  
529 doi:10.1038/nbt.3837
- 530 14. Barker N, Huch M, Kujala P, van de Wetering M, Snippert HJ, van Es JH, et al.  
531 Lgr5(+ve) stem cells drive self-renewal in the stomach and build long-lived gastric  
532 units in vitro. *Cell Stem Cell.* 2010;6: 25–36. doi:10.1016/j.stem.2009.11.013
- 533 15. Boj SF, Hwang C-I, Baker LA, Chio IIC, Engle DD, Corbo V, et al. Organoid  
534 models of human and mouse ductal pancreatic cancer. *Cell.* 2015;160: 324–338.  
535 doi:10.1016/j.cell.2014.12.021
- 536 16. Huch M, Dorrell C, Boj SF, van Es JH, Li VSW, van de Wetering M, et al. In vitro  
537 expansion of single Lgr5+ liver stem cells induced by Wnt-driven regeneration.  
538 *Nature.* 2013;494: 247–250. doi:10.1038/nature11826
- 539 17. Sato T, Stange DE, Ferrante M, Vries RGJ, Van Es JH, Van den Brink S, et al.  
540 Long-term expansion of epithelial organoids from human colon, adenoma,  
541 adenocarcinoma, and Barrett's epithelium. *Gastroenterology.* 2011;141: 1762–  
542 1772. doi:10.1053/j.gastro.2011.07.050
- 543 18. Seidlitz T, Merker SR, Rothe A, Zakrzewski F, von Neubeck C, Grützmann K, et  
544 al. Human gastric cancer modelling using organoids. *Gut.* 2018;  
545 doi:10.1136/gutjnl-2017-314549
- 546 19. Barker N, Huch M, Kujala P, van de Wetering M, Snippert HJ, van Es JH, et al.  
547 Lgr5(+ve) stem cells drive self-renewal in the stomach and build long-lived gastric  
548 units in vitro. *Cell Stem Cell.* 2010;6: 25–36. doi:10.1016/j.stem.2009.11.013
- 549 20. Farin HF, Van Es JH, Clevers H. Redundant sources of Wnt regulate intestinal  
550 stem cells and promote formation of Paneth cells. *Gastroenterology.* 2012;143:  
551 1518–1529.e7. doi:10.1053/j.gastro.2012.08.031
- 552 21. Andersson-Rolf A, Mustata RC, Merenda A, Kim J, Perera S, Grego T, et al. One-  
553 step generation of conditional and reversible gene knockouts. *Nat Methods.*  
554 2017;14: 287–289. doi:10.1038/nmeth.4156
- 555 22. Bijsmans ITGW, Milona A, Ijssennagger N, Willemsen ECL, Ramos Pittol JM,  
556 Jonker JW, et al. Characterization of stem cell-derived liver and intestinal  
557 organoids as a model system to study nuclear receptor biology. *Biochim Biophys*  
558 *Acta.* 2017;1863: 687–700. doi:10.1016/j.bbadis.2016.12.004
- 559 23. Ciorba MA. Scap and the intestinal epithelial stem cell niche: new insights from  
560 lipid biology. *J Lipid Res.* 2015;56: 1381–1382. doi:10.1194/jlr.C061309
- 561 24. Chen W-C, Wang C-Y, Hung Y-H, Weng T-Y, Yen M-C, Lai M-D. Systematic  
562 Analysis of Gene Expression Alterations and Clinical Outcomes for Long-Chain  
563 Acyl-Coenzyme A Synthetase Family in Cancer. *PLoS ONE.* 2016;11.  
564 doi:10.1371/journal.pone.0155660



- 565 25. Heimerl S, Moehle C, Zahn A, Boettcher A, Stremmel W, Langmann T, et al.  
566 Alterations in intestinal fatty acid metabolism in inflammatory bowel disease.  
567 *Biochim Biophys Acta*. 2006;1762: 341–350. doi:10.1016/j.bbadis.2005.12.006
- 568 26. Cao Y, Dave KB, Doan TP, Prescott SM. Fatty acid CoA ligase 4 is up-regulated  
569 in colon adenocarcinoma. *Cancer Res*. 2001;61: 8429–8434.
- 570 27. Roongta UV, Pabalan JG, Wang X, Ryseck R-P, Fagnoli J, Henley BJ, et al.  
571 Cancer cell dependence on unsaturated fatty acids implicates stearoyl-CoA  
572 desaturase as a target for cancer therapy. *Mol Cancer Res MCR*. 2011;9: 1551–  
573 1561. doi:10.1158/1541-7786.MCR-11-0126
- 574 28. Igal RA. Stearoyl CoA desaturase-1: New insights into a central regulator of  
575 cancer metabolism. *Biochim Biophys Acta*. 2016;1861: 1865–1880.  
576 doi:10.1016/j.bbali.2016.09.009
- 577 29. Chen L, Ren J, Yang L, Li Y, Fu J, Li Y, et al. Stearoyl-CoA desaturase-1  
578 mediated cell apoptosis in colorectal cancer by promoting ceramide synthesis. *Sci*  
579 *Rep*. 2016;6: 19665. doi:10.1038/srep19665
- 580 30. Ran H, Zhu Y, Deng R, Zhang Q, Liu X, Feng M, et al. Stearoyl-CoA desaturase-1  
581 promotes colorectal cancer metastasis in response to glucose by suppressing  
582 PTEN. *J Exp Clin Cancer Res CR*. 2018;37: 54. doi:10.1186/s13046-018-0711-9
- 583 31. Qiu Y, Cai G, Zhou B, Li D, Zhao A, Xie G, et al. A distinct metabolic signature  
584 of human colorectal cancer with prognostic potential. *Clin Cancer Res Off J Am*  
585 *Assoc Cancer Res*. 2014;20: 2136–2146. doi:10.1158/1078-0432.CCR-13-1939
- 586 32. Lu Y, Zhou Z, Tao J, Dou B, Gao M, Liu Y. Overexpression of stearoyl-CoA  
587 desaturase 1 in bone marrow mesenchymal stem cells enhance the expression of  
588 induced endothelial cells. *Lipids Health Dis*. 2014;13: 53. doi:10.1186/1476-511X-  
589 13-53
- 590 33. Tao J, Shi J, Lu Y, Dou B, Zhou Z, Gao M, et al. Overexpression of stearoyl-CoA  
591 desaturase 1 in bone-marrow mesenchymal stem cells increases osteogenesis.  
592 *Panminerva Med*. 2013;55: 283–289.
- 593 34. Wu Q, Yang Z, Wang F, Hu S, Yang L, Shi Y, et al. MiR-19b/20a/92a regulates  
594 the self-renewal and proliferation of gastric cancer stem cells. *J Cell Sci*. 2013;126:  
595 4220–4229. doi:10.1242/jcs.127944
- 596 35. Xiang J, Wu J. Feud or Friend? The Role of the miR-17-92 Cluster in  
597 Tumorigenesis. *Curr Genomics*. 2010;11: 129–135.  
598 doi:10.2174/138920210790886853
- 599 36. Zhang K, Zhang L, Zhang M, Zhang Y, Fan D, Jiang J, et al. Prognostic value of  
600 high-expression of miR-17-92 cluster in various tumors: evidence from a meta-  
601 analysis. *Sci Rep*. 2017;7: 8375. doi:10.1038/s41598-017-08349-4
- 602 37. Cheng X, Zhang X, Su J, Zhang Y, Zhou W, Zhou J, et al. miR-19b downregulates  
603 intestinal SOCS3 to reduce intestinal inflammation in Crohn's disease. *Sci Rep*.  
604 2015;5. doi:10.1038/srep10397

- 605 38. Lee JH, Kim TI, Jeon SM, Hong SP, Cheon JH, Kim WH. The effects of  
606 metformin on the survival of colorectal cancer patients with diabetes mellitus. *Int J*  
607 *Cancer*. 2012;131: 752–759. doi:10.1002/ijc.26421
- 608 39. De Monte A, Brunetti D, Cattin L, Lavanda F, Naibo E, Malagoli M, et al.  
609 Metformin and aspirin treatment could lead to an improved survival rate for Type  
610 2 diabetic patients with stage II and III colorectal adenocarcinoma relative to non-  
611 diabetic patients. *Mol Clin Oncol*. 2018;8: 504–512. doi:10.3892/mco.2018.1554
- 612 40. Miranda VC, Braghiroli MI, Faria LD, Bariani G, Alex A, Bezerra Neto JE, et al.  
613 Phase 2 Trial of Metformin Combined With 5-Fluorouracil in Patients With  
614 Refractory Metastatic Colorectal Cancer. *Clin Colorectal Cancer*. 2016;15: 321–  
615 328.e1. doi:10.1016/j.clcc.2016.04.011
- 616 41. Effect of metformin alone and in combination with 5-fluorouracil (5FU),  
617 oxaliplatin (O) and irinotecan (I) on human colon cancer cell lines.: *Journal of*  
618 *Clinical Oncology*: Vol 29, No 15\_suppl [Internet]. [cited 26 Jul 2018]. Available:  
619 [http://ascopubs.org/doi/abs/10.1200/jco.2011.29.15\\_suppl.e13041](http://ascopubs.org/doi/abs/10.1200/jco.2011.29.15_suppl.e13041)
- 620 42. Griss T, Vincent EE, Egnatchik R, Chen J, Ma EH, Faubert B, et al. Metformin  
621 Antagonizes Cancer Cell Proliferation by Suppressing Mitochondrial-Dependent  
622 Biosynthesis. *PLoS Biol*. 2015;13: e1002309. doi:10.1371/journal.pbio.1002309
- 623 43. Yan S, Yang X-F, Liu H-L, Fu N, Ouyang Y, Qing K. Long-chain acyl-CoA  
624 synthetase in fatty acid metabolism involved in liver and other diseases: an update.  
625 *World J Gastroenterol*. 2015;21: 3492–3498. doi:10.3748/wjg.v21.i12.3492
- 626 44. Ghadge A, Harsulkar A, Karandikar M, Pandit V, Kuvalekar A. Comparative anti-  
627 inflammatory and lipid-normalizing effects of metformin and omega-3 fatty acids  
628 through modulation of transcription factors in diabetic rats. *Genes Nutr*. 2016;11.  
629 doi:10.1186/s12263-016-0518-4
- 630 45. Zabielski P, Chacinska M, Charkiewicz K, Baranowski M, Gorski J, Blachnio-  
631 Zabielska AU. Effect of metformin on bioactive lipid metabolism in insulin-  
632 resistant muscle. *J Endocrinol*. 2017;233: 329–340. doi:10.1530/JOE-16-0381
- 633 46. Metformin and Cancer Stem Cells: Old Drug, New Targets | Cancer Prevention  
634 Research [Internet]. [cited 30 Jul 2018]. Available:  
635 <http://cancerpreventionresearch.aacrjournals.org/content/5/3/351>
- 636 47. Mogavero A, Maiorana MV, Zanutto S, Varinelli L, Bozzi F, Belfiore A, et al.  
637 Metformin transiently inhibits colorectal cancer cell proliferation as a result of  
638 either AMPK activation or increased ROS production. *Sci Rep*. 2017;7: 15992.  
639 doi:10.1038/s41598-017-16149-z
- 640 48. Andrzejewski S, Gravel S-P, Pollak M, St-Pierre J. Metformin directly acts on  
641 mitochondria to alter cellular bioenergetics. *Cancer Metab*. 2014;2: 12.  
642 doi:10.1186/2049-3002-2-12

643

## 644 **Supporting information**

645 **S1 Table.** Primers' sequences (Invivogen) used for quantitative real-time PCR.

646 **S2 Table.** Probes from TaqMan® MicroRNA Assays (ThermoFisher) used for  
647 quantitative real-time PCR.

648  
649 **S1 Fig. ACSL1 and SCD mRNA expression throughout CRC-like organoids stages**

650 RT-QPCR analysis showing ACSL1 (A) and SCD (B) mRNA expression levels  
651 throughout CRC- like organoids stages. Results represent the fold-change mean  $\pm$ SD ( $n$   
652 = 3) (ns,  $P > 0.05$ ; \*,  $P \leq 0.05$ ; \*\*,  $P \leq 0.01$ ; \*\*\*,  $P \leq 0.001$ ; \*\*\*\*,  $P \leq 0.0001$ )

653 **S2 Fig. ACSL/SCD regulatory miRNAs expression in CRC-like organoids**

654 RT-QPCR analysis showing mRNA expression levels throughout CRC-like organoids  
655 stages of different ACSL/SCD regulatory miRNAs: miR-19b-1-5p (A), miR-142-3p (B),  
656 miR-142-5p (C). Results represent the fold-change mean  $\pm$ SD ( $n = 3$ ). (ns,  $P > 0.05$ ; \*,  $P$   
657  $\leq 0.05$ ; \*\*,  $P \leq 0.01$ ; \*\*\*,  $P \leq 0.001$ ; \*\*\*\*,  $P \leq 0.0001$ ).

658

659 **S3 Fig. Metformin and 5-FU effect in CRC-like organoids.**

660 MTT cell viability assays upon 48 hours treatments with PBS (black bars), 10  $\mu$ M  
661 Metformin (yellow bars) or 10, 100 and 150  $\mu$ M 5-FU (grey bars) in the different CRC-  
662 like organoids representative stages: WT organoids (A);  $APC^{fl/fl}$  organoids resembling  
663 stage I (B);  $APC^{fl/fl}$ ,  $KRAS^{G12D/WT}$  organoids resembling stage II (C);  $APC^{fl/fl}$ ,  
664  $KRAS^{G12D/WT}$ ,  $P53^{R172H/WT}$  organoids resembling stage III (D);  $APC^{fl/fl}$ ,  
665  $KRAS^{G12D/WT}$ ,  $P53^{R172H/WT}$ ,  $Smad4^{fl/fl}$  organoids resembling stage IV (E). Data

666 are represented by the fold-change mean  $\pm$ SD ( $n = 3$ ) in all the plots. (ns,  $P > 0.05$ ; \*,  $P$   
667  $\leq 0.05$ ; \*\*,  $P \leq 0.01$ ; \*\*\*,  $P \leq 0.001$ ; \*\*\*\*,  $P \leq 0.0001$ ).

668

#### 669 **S4 Fig. Metformin and 5-FU recovery effect in CRC-like organoids.**

670 MTT cell viability assays upon 48 hours treatments (black bars) and upon extra 72h post-  
671 treatment recovery with PBS (light grey bars), 10  $\mu$ M Metformin (yellow bars) or 10, 100  
672 and 150  $\mu$ M 5-FU (dark grey bars) in the different CRC-like organoids representative  
673 stages:: WT organoids (A);  $APC^{fl/fl}$  organoids resembling stage I (B);  $APC^{fl/fl}$  ,  
674  $KRAS^{G12D/WT}$  organoids resembling stage II (C);  $APC^{fl/fl}$  ,  $KRAS^{G12D/WT}$   
675 ,  $P53^{fl/R172H}$  organoids resembling stage III (D);  $APC^{fl/fl}$  ,  $KRAS^{G12D/WT}$   
676 ,  $P53^{fl/R172H}$  ,  $Smad4^{fl/fl}$  organoids resembling stage IV (E). Data are represented by the  
677 fold-change mean  $\pm$ SD ( $n = 3$ ) in all the plots. (ns,  $P > 0.05$ ; \*,  $P \leq 0.05$ ; \*\*,  $P \leq 0.01$ ;  
678 \*\*\*,  $P \leq 0.001$ ; \*\*\*\*,  $P \leq 0.0001$ ).

679

#### 680 **S5 Fig. ACSL/SCD axis and stem cell markers expression (Lgr5, Axin-2 and Ctnnb- 681 1) upon Metformin and 5-FU treatment**

682 Expression leveles of enzymes related to the ACSL/SCD axis, ACSL1 (A), ACSL4 (B)  
683 and SCD (C) by RT-QPCR; and expression levels of different stem cell markers, Lgr5  
684 (D), Axin-2 (E) and Ctnnb-1 (F) by RT-QPCR; upon PBS (black bars), 10  $\mu$ M Metformin  
685 (yellow bars) or 10, 100 and 150  $\mu$ M 5-FU (grey bars). Data are represented by the fold-  
686 change mean  $\pm$ SD ( $n = 3$ ). (ns,  $P > 0.05$ ; \*,  $P \leq 0.05$ ; \*\*,  $P \leq 0.01$ ; \*\*\*,  $P \leq 0.001$ ; \*\*\*\*,  
687  $P \leq 0.0001$ ).

688

689 **S6 Fig. Comparative organoids morphology between Metformin and other**  
690 **oncologic treatments.**

691 Organoids (stage I and III) representative pictures with DMSO, Metformin and other  
692 metabolic drugs against CRC progression, upon 48 hours treatments plus upon extra 72h  
693 post-treatment recovery. Pictures were captured using the  $\times 10$  objective, in bright field.  
694 Leica microscope (Leica microsystems).

695

696

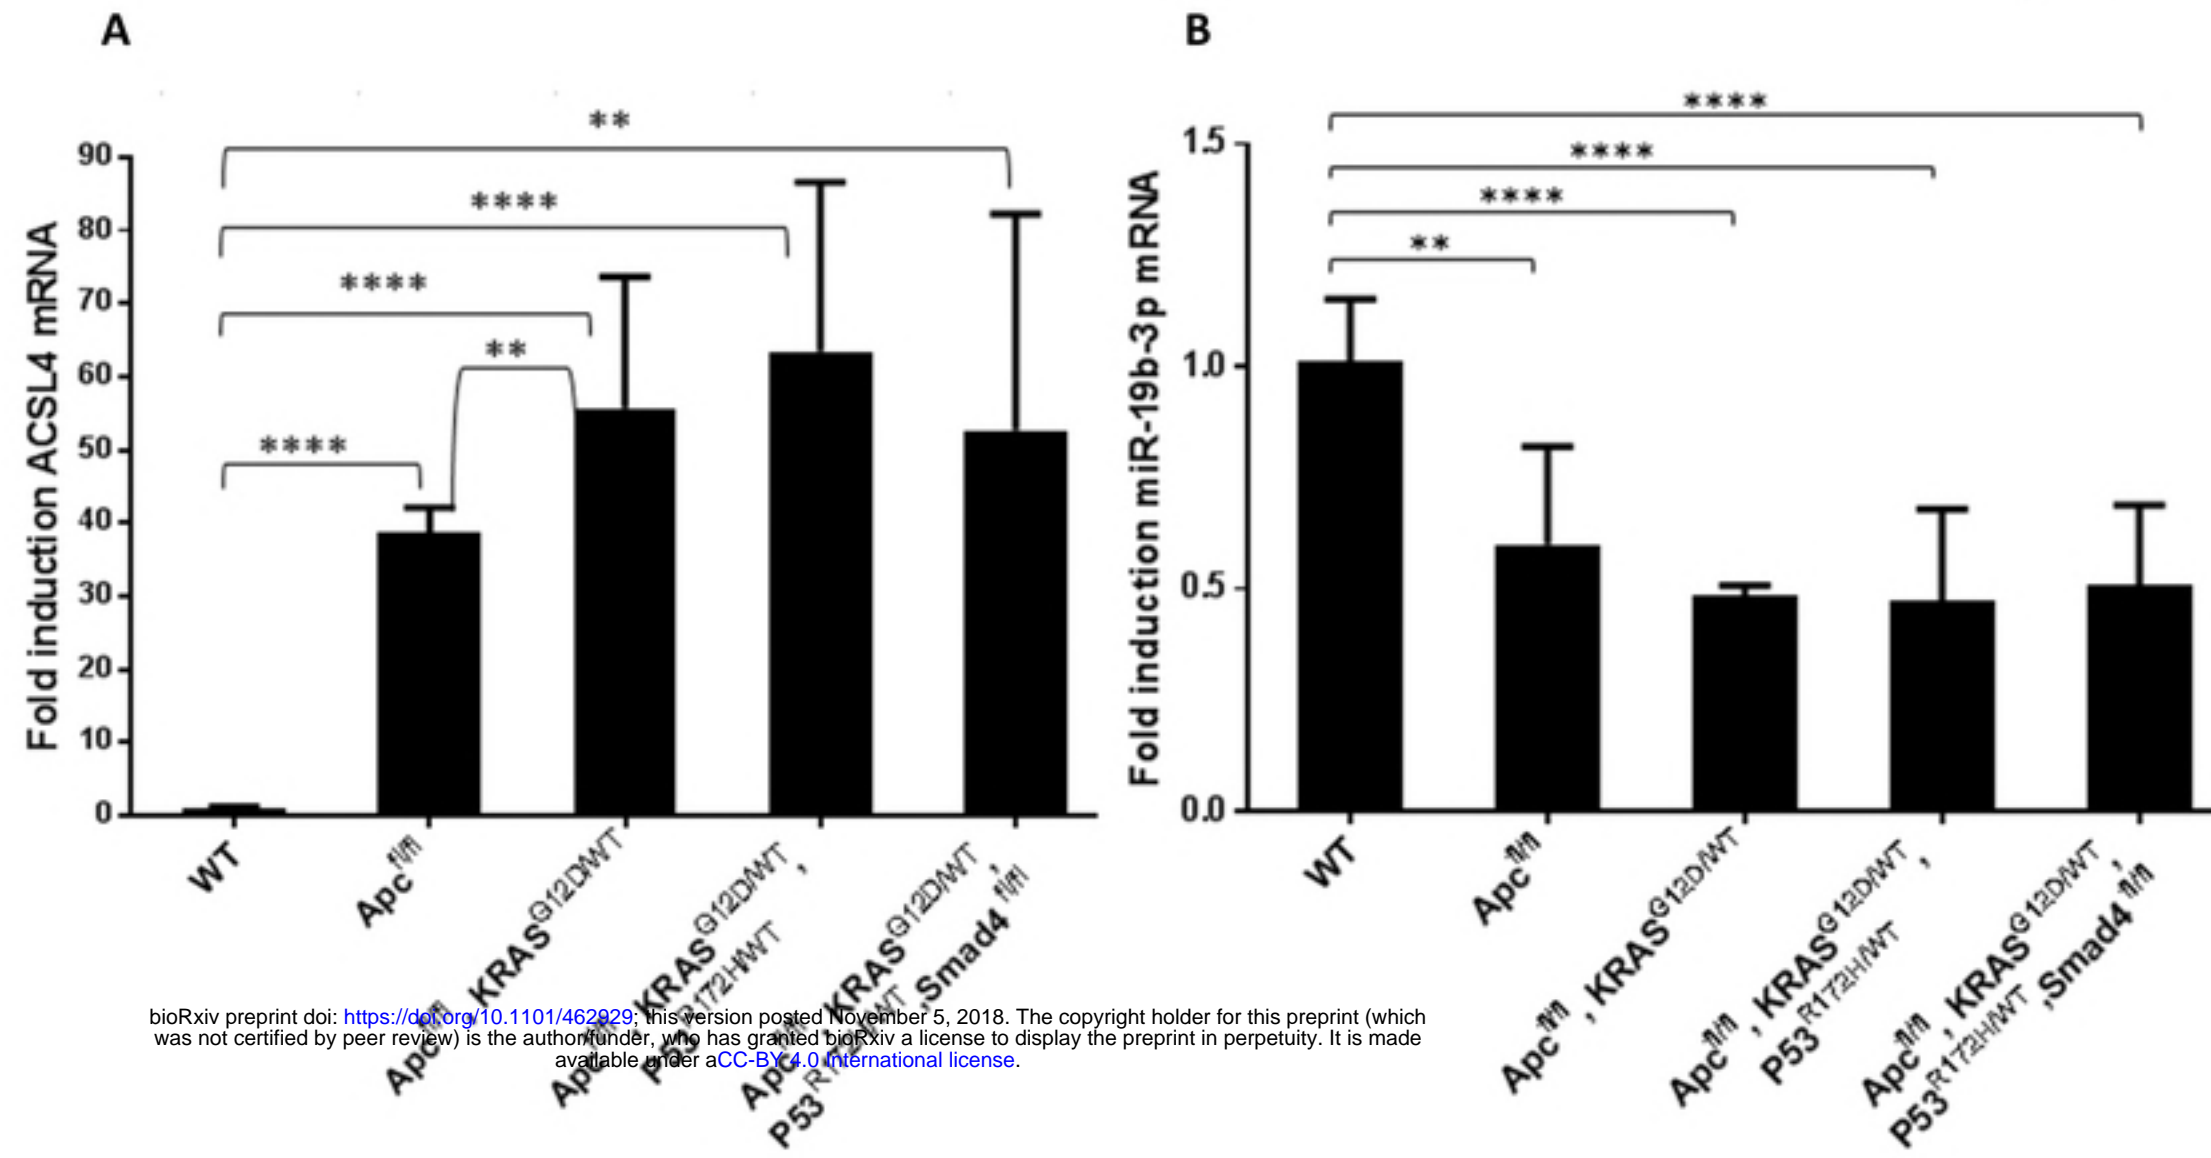

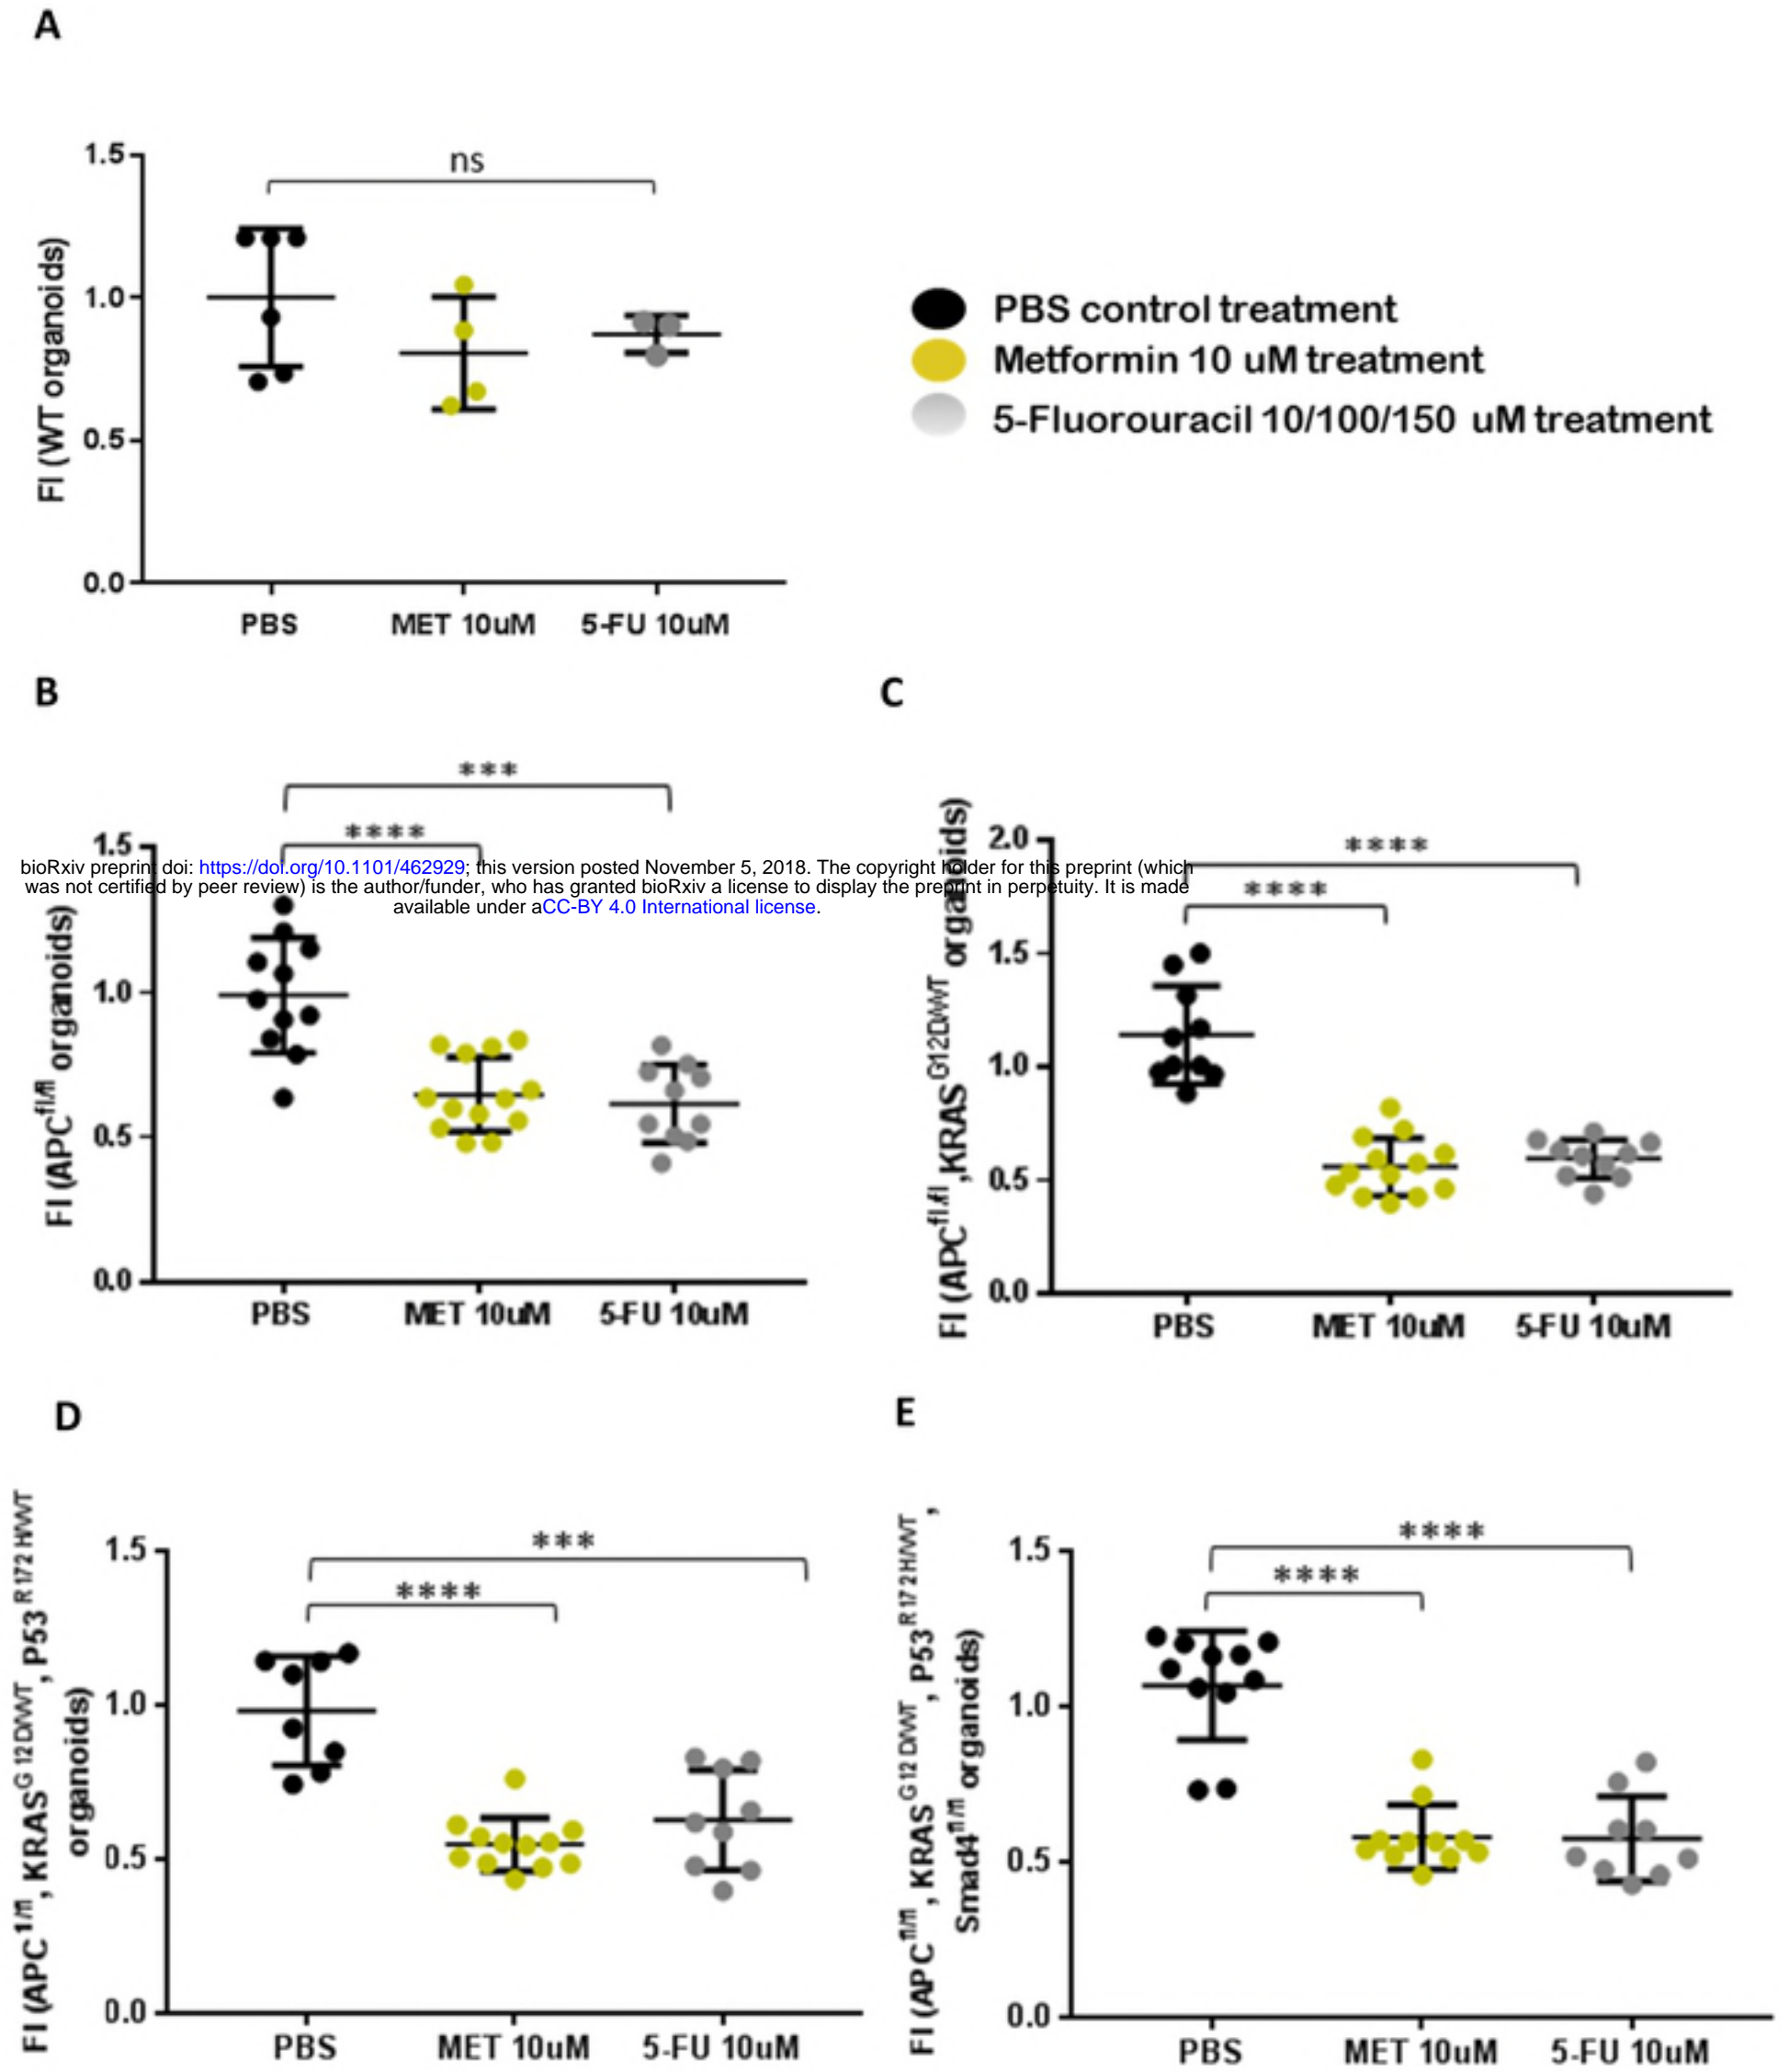

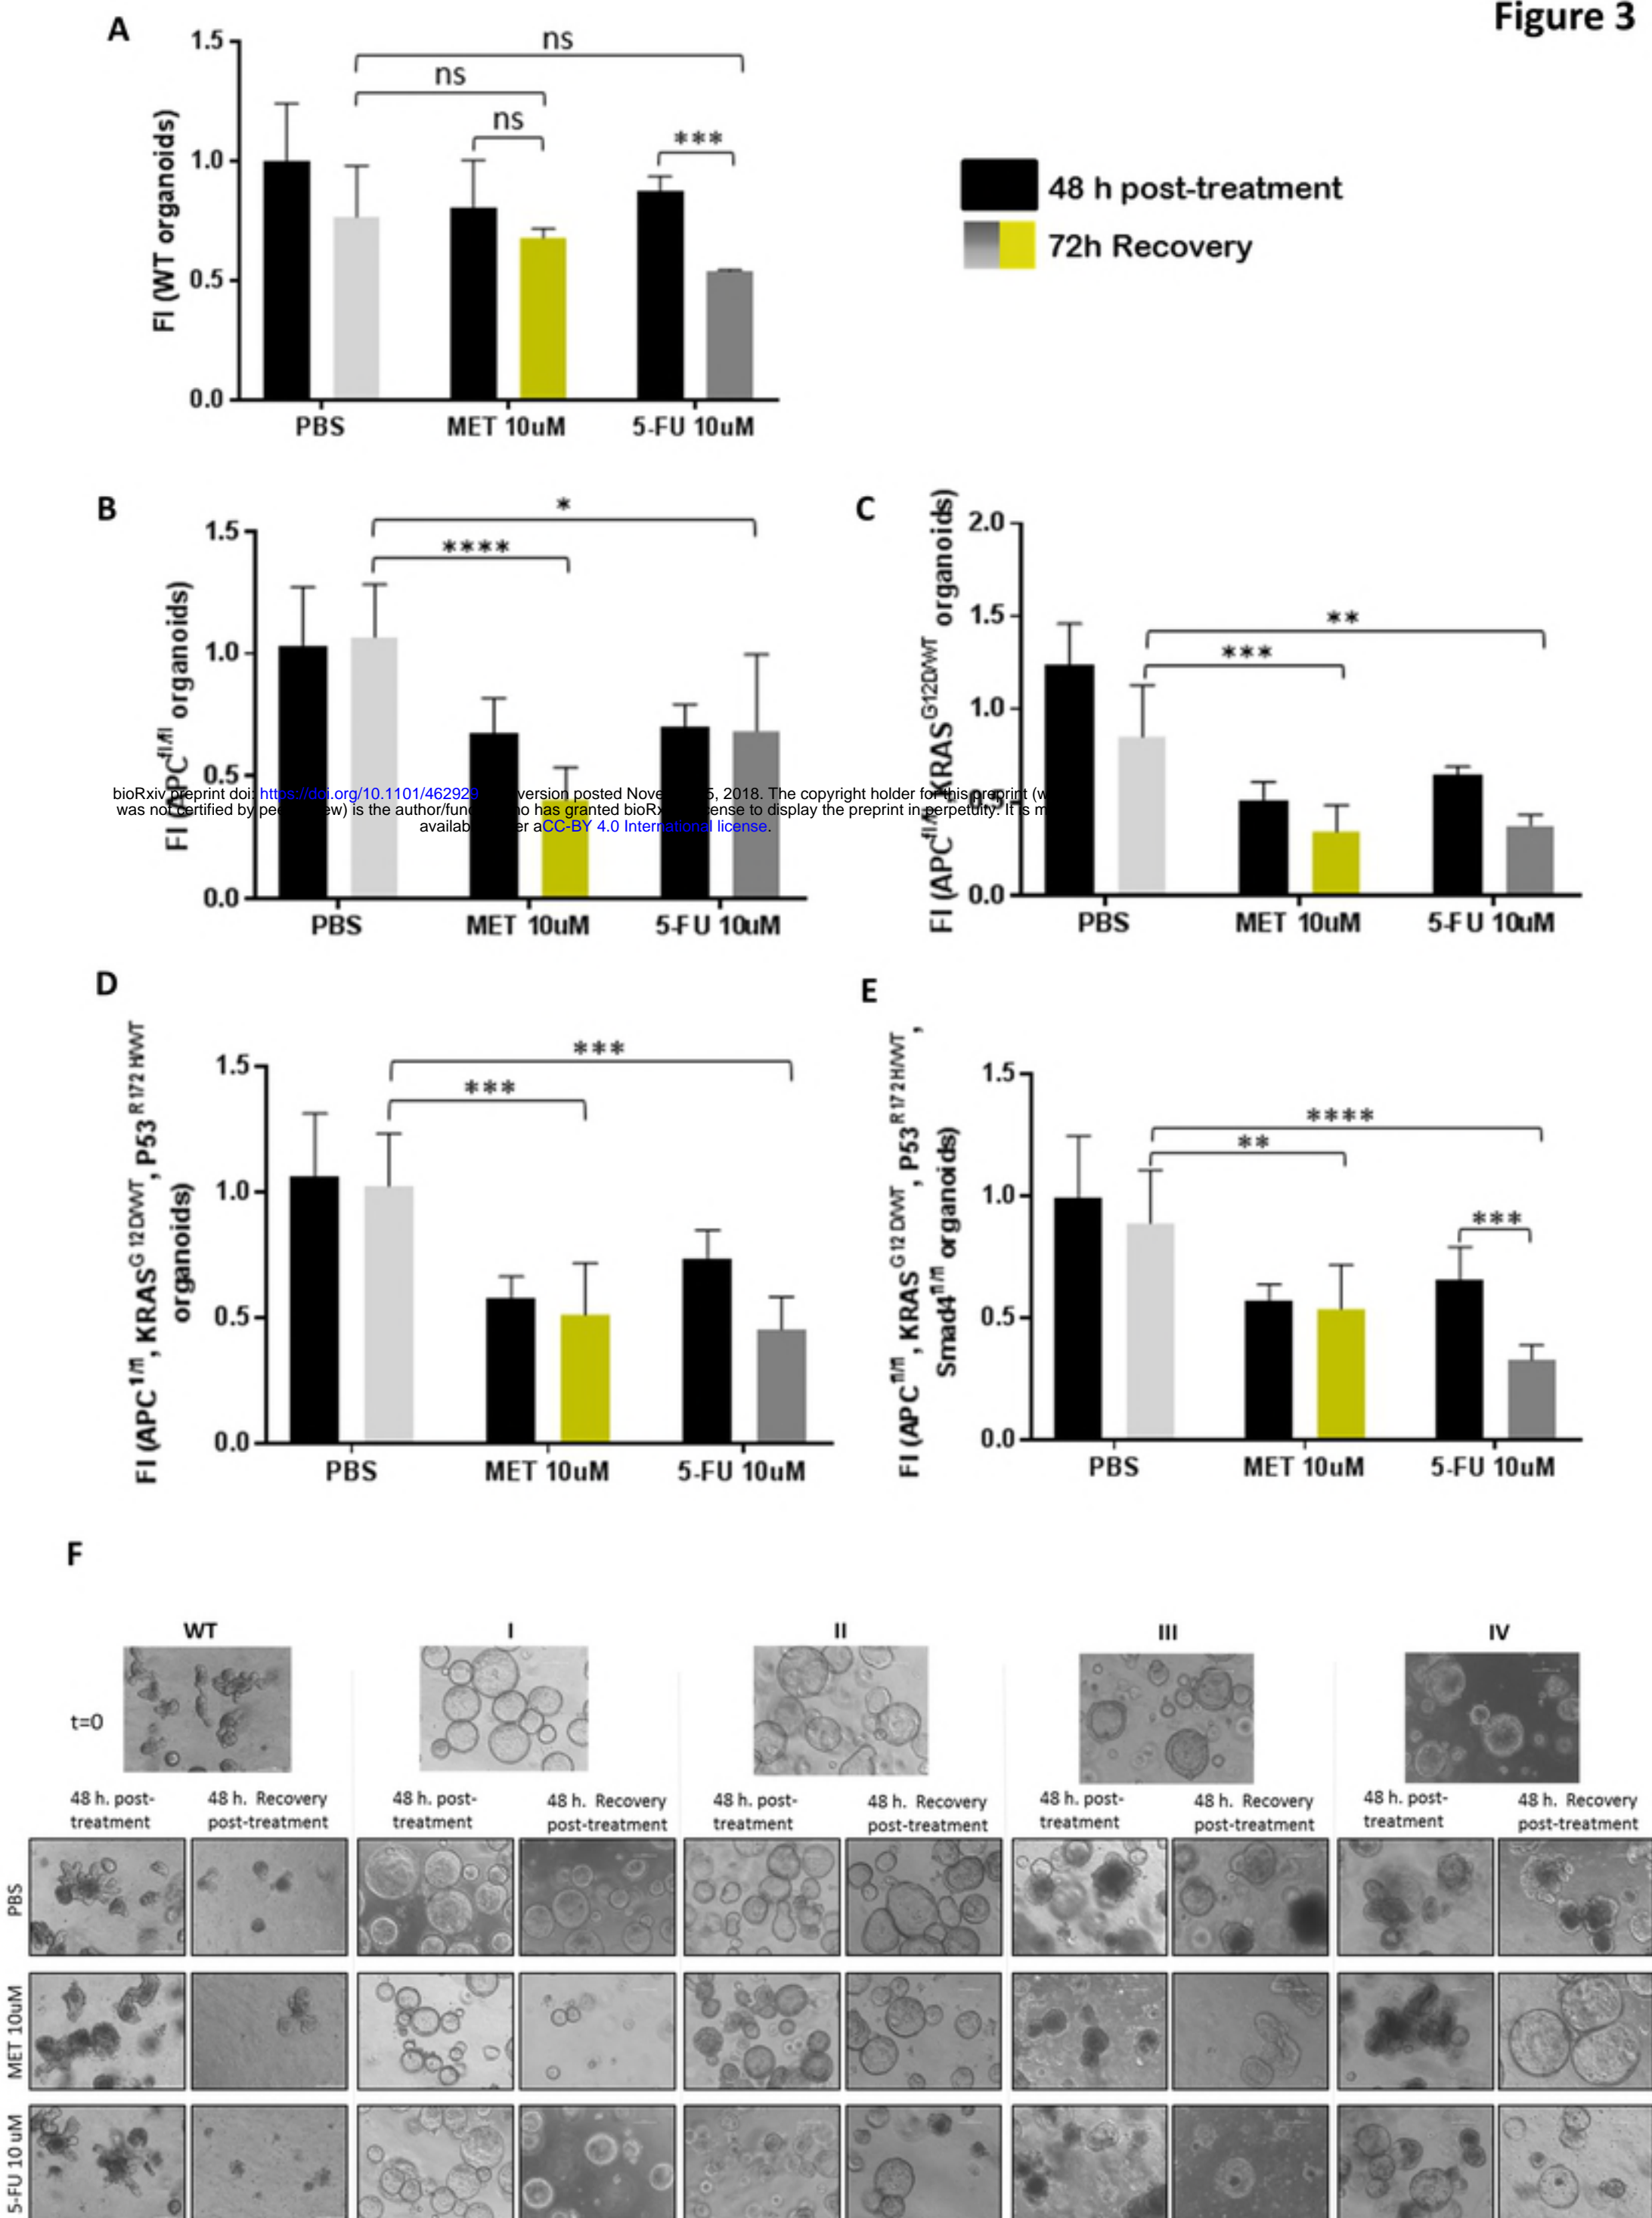



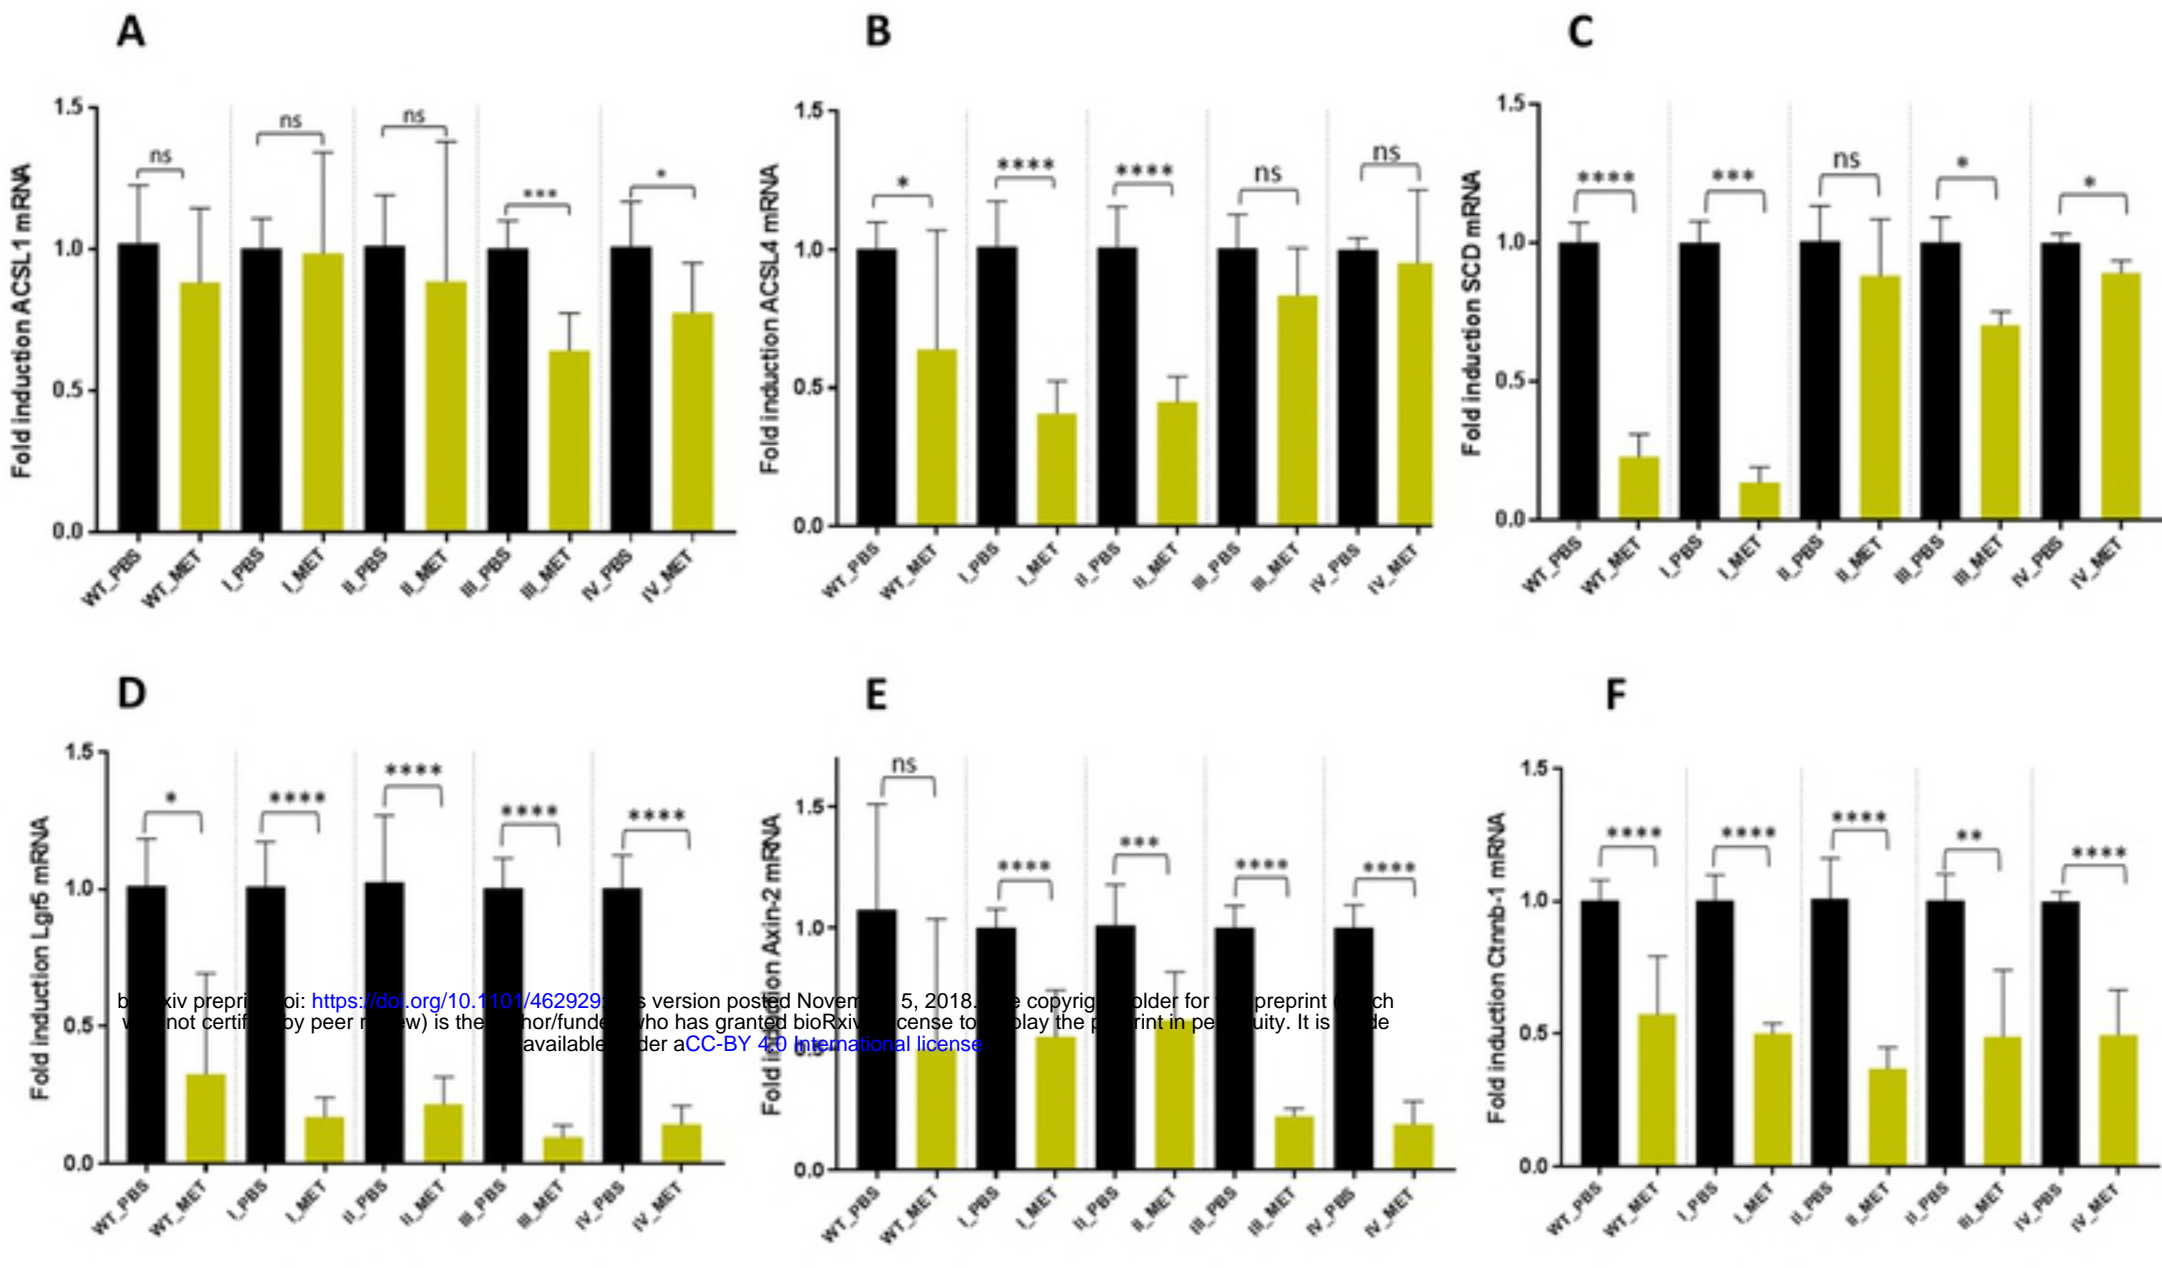

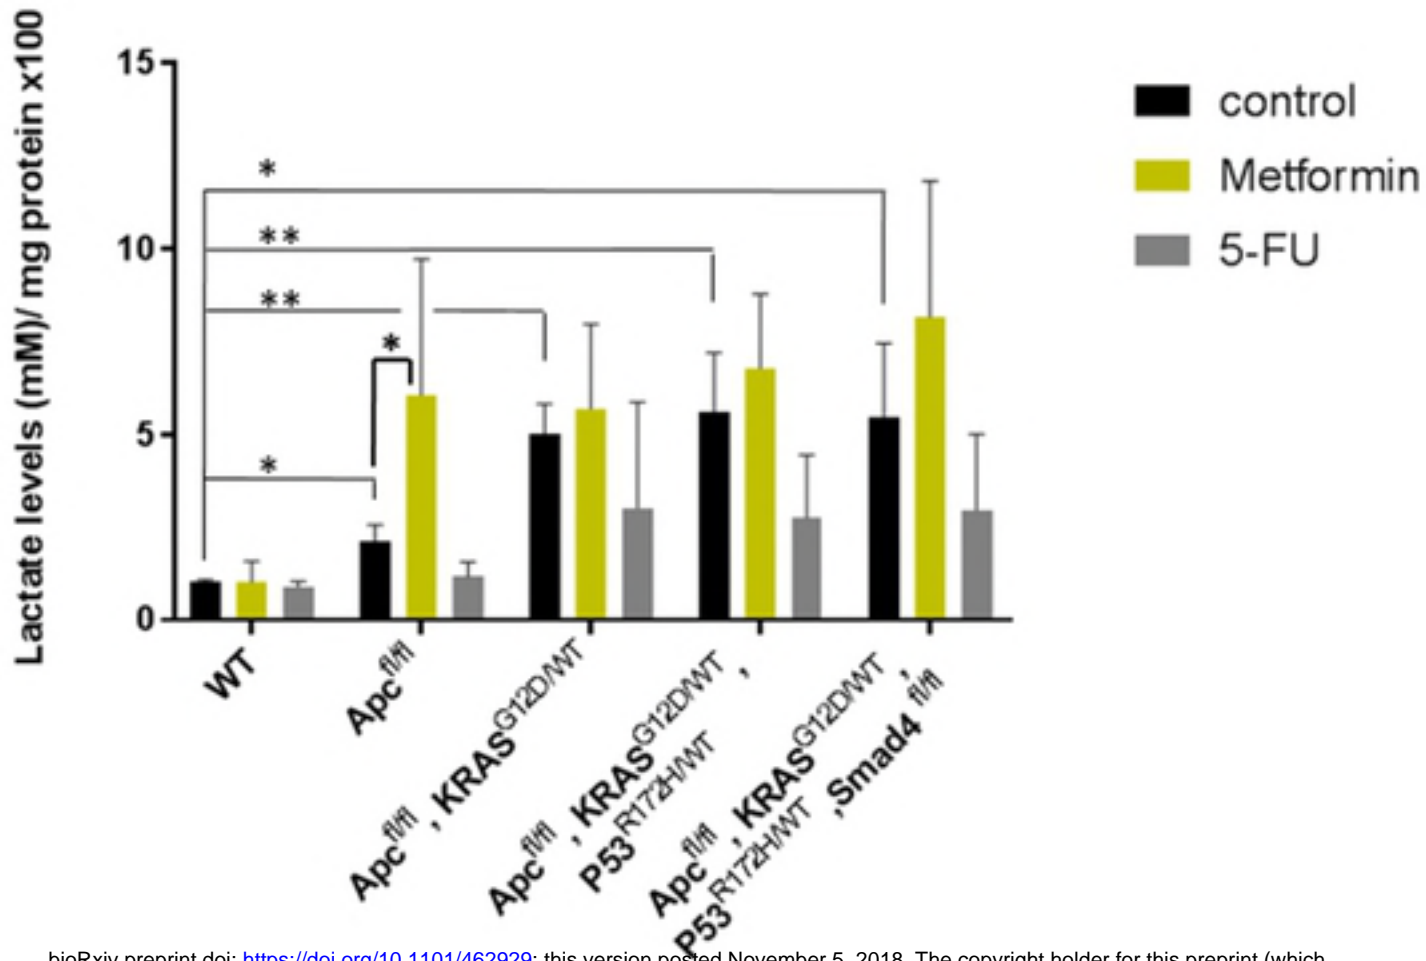

bioRxiv preprint doi: <https://doi.org/10.1101/462929>; this version posted November 5, 2018. The copyright holder for this preprint (which was not certified by peer review) is the author/funder, who has granted bioRxiv a license to display the preprint in perpetuity. It is made available under aCC-BY 4.0 International license.
